## Review Article

Title: The relationship between health literacy and adherence to physical activity guidelines:  
a scoping review.

Alex Lawrence<sup>1</sup>, Jon Wardle<sup>2</sup> and Jacqui Susan Yoxall<sup>1</sup>

1. Faculty of Health, Southern Cross University.

2. National Centre for Naturopathic Medicine, Faculty of Health, Southern Cross University.

Address for Correspondence

Alex Lawrence

Faculty of Health

Southern Cross University

Hogbin Drive

Coffs Harbour, 2450, NSW Australia

Email: [alex.lawrence@scu.edu.au](mailto:alex.lawrence@scu.edu.au)

Ph: 0423915662

Abstract word count: 180

Total word count: 4879

Figures: 1

Tables: 1

Appendices: 0

Acknowledgements:

Declaration of Interest Statement: The authors reported No potential competing interest.

Funder Information: No funding was obtained for this project

30 **Abstract**

31 Objective: To examine the relationship between health literacy and adherence to physical  
32 activity guidelines.

33

34 Methods: In line with the Joanna Briggs Institute framework, we conducted a scoping review  
35 of the literature.

36

37 Results: Out of 2,098 articles identified, 20 met the inclusion criteria. The studies utilised  
38 various health literacy measurement tools, with the European Health Literacy Survey being  
39 used the most. Fifteen studies examined the association between total health literacy scores and  
40 achieving >150 minutes of moderate-to-vigorous physical activity weekly. Nine studies  
41 reported a positive association, while others found no significant association. In particular,  
42 studies using self-reported physical activity more frequently found an association, whereas no  
43 association was found when using objective physical activity measures.

44

45 Conclusions: The findings of this review were inconclusive. The lack of standard health  
46 literacy instruments and reporting presents a barrier to the field of knowledge progressing.  
47 Moreover, longitudinal relationships between health literacy, mediators and physical activity  
48 need to be investigated.

49

50 Implications for public health: Policymakers should be cautious about using health literacy as  
51 the main focus of programs that aim to increase population physical activity.

52

53

54

55

56

57

58

59

60

61

62

63

64

65

66

67

68

69

70

71

72

**Keywords:** Health literacy, physical activity, health promotion

## 73 Introduction

74 Health literacy (HL) refers to an individual's capacity to navigate, understand, and use health-  
75 related information to manage their health.<sup>1,2</sup> Low health literacy is linked to poor health  
76 outcomes, including higher mortality rates, medication non-adherence, and difficulties  
77 navigating health systems,<sup>3-6</sup> and increased risk of unhealthy behaviours, such as physical  
78 inactivity.<sup>5</sup> Such associations make HL particularly important for public health and health  
79 promotion efforts.

80  
81 Approximately one-third (31%) of adults, or 1.8 billion people, are physically inactive.<sup>6</sup>  
82 Physical inactivity is a major modifiable risk factor of all-cause mortality, accounting for 6%  
83 of premature deaths worldwide.<sup>7,8</sup> Increasing physical activity (PA) prevents, mitigates, and  
84 ameliorates the effects of many non-communicable diseases, injuries, and associated  
85 comorbidities.<sup>9</sup> Furthermore, achieving the recommended levels of PA can reduce the risk of  
86 all-cause mortality by 75%.<sup>10</sup> While meeting the PA guidelines is attainable for most  
87 individuals, adopting and maintaining an active lifestyle also requires significant cognitive  
88 skills to overcome motivational and scheduling barriers.<sup>11</sup> As efforts to achieve global PA  
89 targets continue, the nexus between HL and adherence to PA guidelines is becoming  
90 increasingly relevant.

91  
92 Previous systematic reviews have concluded that there is a positive relationship between HL  
93 and PA levels across different age groups.<sup>12,13</sup> However, these findings referred to increase in  
94 PA irrespective of whether such an increase meets recommended PA guidelines. Although any  
95 increase in PA is broadly beneficial, public health policy and surveillance are primarily  
96 concerned with adherence to PA guidelines. By focusing on PA guidelines, the outcomes of  
97 this study align with public health priorities; targeting the relationship between HL and the  
98 threshold of PA most likely to result in meaningful health improvements.

99  
100 The variation in PA and HL measurement tools, and the complex nature of the HL construct  
101 generally<sup>14, 15</sup> make comparing and synthesising findings across studies challenging. Scoping  
102 reviews, however, are particularly valuable in such cases, as they are well-suited for literature  
103 that is heterogeneous.<sup>16</sup> Scoping reviews aim to provide an overview of an area or issue.<sup>17</sup> They  
104 can help identify knowledge gaps, evaluate the breadth of literature, develop areas of inquiry,  
105 or review prior research methods.<sup>18</sup> For example, scoping reviews can inform systematic  
106 reviews about whether the inclusion criteria or research questions are appropriate. A scoping  
107 review of the relationships between PA and HL would allow for a broader review of  
108 quantitative, qualitative, and mixed-methods research across various academic disciplines  
109 (E.g., public health, education, psychology, and sports science) to highlight areas lacking  
110 research. To our knowledge, no scoping review on HL and PA has been published.

111  
112 This scoping review aims to identify and synthesise research on the relationships between HL  
113 and adherence to PA recommendations. Specifically, the proposed review seeks to answer the  
114 following review questions: (i) What is the association between HL and adhering to PA  
115 guidelines in the general adult population?; (ii) What HL constructs are being measured, and  
116 what instruments are used to assess them?; (iii) How does implementing HL interventions

117 compare to no intervention or standard care impact adherence to PA guidelines in the general  
118 adult population?; and (iv) What are the patient and social-level factors suggested to influence  
119 the connection between HL and health numeracy, and adhering to PA guidelines?

120

## 121 **Materials and Methods**

122

123 This scoping review followed the Joanna Briggs Institute (JBI) approach to scoping reviews.<sup>18</sup>  
124 The JBI approach was used for its methodological quality and the availability of tools to guide  
125 scoping reviews.<sup>19</sup> The research team developed the review protocol and registered with the  
126 Open Science Framework on the 20<sup>th</sup> of February 2024 (<https://osf.io/smqfj>). This report was  
127 written using the Preferred Reporting Items for Systematic Reviews and Meta-Analyses  
128 Extension for Scoping Reviews (PRISMA-ScR) checklist.<sup>20</sup>

129

130 To identify the key concepts relevant to the primary research question, "What is the association  
131 between health literacy and physical activity in the general adult population?" we used the  
132 Population, Concept, and Context (PCC) framework recommended by the Joanna Briggs  
133 Institute.

134

### 135 Eligibility criteria

136 We included observational or intervention studies written in English and involved the general  
137 adult population (18 years or older). The restriction to studies written in English was due to  
138 resource constraints. Studies with adults and children were considered if they reported data  
139 separately for adults. However, studies focused exclusively on adolescents or children were  
140 excluded.

141

142 Eligible research studies used a validated, objective measure of HL. Studies that related upon  
143 self-assessed (i.e., subjective) measures, where participants estimate their HL, were excluded  
144 as these assessments are generally intended for use in clinical settings rather than research  
145 purposes. For intervention studies, HL needed to be objectively measured both at baseline and  
146 after the intervention [21] to be included.

147

148 To qualify for inclusion, PA needed to be reported as either a primary or secondary outcome,  
149 and groups need to be dichotomised as physically active or inactive or similar. For this study,  
150 people who do not meet recommended levels of regular PA were defined as "physically  
151 inactive". Where pedometers were used to measure PA, participants must achieve at least 7,000  
152 steps per day to be considered sufficiently active.

153

### 154 Information sources and search

155 The search strategy followed the Peer Review of Electronic Search Strategies standard.<sup>22</sup> An  
156 initial search on PubMed was performed to identify relevant articles based on keywords in  
157 titles, abstracts, and index terms. Subsequently, a Health Sciences Librarian assessed the  
158 strategy to balance breadth, comprehensiveness, and feasibility. A search strategy was then  
159 tested on PubMed to verify and refine the search query as needed to ensure it captured a  
160 significant number of relevant studies. Once finalised, the strategy was adjusted to suit other

161 databases' syntax and subject headings. Validation and updates will continue throughout the  
162 review process to maintain the effectiveness of the PubMed search strategy. The following  
163 bibliographic databases were searched: MEDLINE, ProQuest, Scopus, CINAHL, Web of  
164 Science (Core Collection), PubMed, and PsycINFO. The search was unrestricted by date. To  
165 achieve literature saturation, we will examine the reference lists of included studies and  
166 relevant reviews identified during the search process.

#### 167 168 Information sources and search

169 The results of each review were exported to EndNote 20 (Clarivate Analytics, PA, USA) to  
170 remove duplicates. The remaining articles were imported into Covidence  
171 ([www.covidence.org](http://www.covidence.org)) for further duplicate detection. One reviewer screened the titles and  
172 abstracts; potentially relevant articles were retrieved in full and added to Covidence. Two  
173 independent reviewers assessed the full texts against the inclusion criteria, with any  
174 exclusions documented according to JBI guidelines. Discrepancies were resolved through  
175 discussion or by consulting an additional reviewer. The search results and study inclusion  
176 process will be detailed in the final scoping review and presented using a PRISMA-ScR flow  
177 diagram.<sup>20</sup>

#### 178 179 Data Extraction

180 The Joanna Briggs Institute standardised data extraction form guided data extraction from  
181 each included study. The data extraction form was piloted on a small subset of studies to  
182 ensure clarity, completeness, and consistency in data collection. The form was refined based  
183 on issues identified during this pilot phase. Data extraction was performed independently by  
184 one reviewer (AL). The reviewers were not required to contact study authors or investigators  
185 to clarify any ambiguous or missing data. The reason for exclusion has been noted and  
186 described in the PRISMA flow diagram (Figure 1). Consistent with guidance on scoping  
187 reviews, we did not perform any methodological quality appraisal of the included reports.

#### 188 189 Data analysis

190 A numerical analysis of the nature and extent of the studies was performed. A narrative  
191 summary supplemented the analysis to synthesise the main themes, patterns, and conclusions  
192 from the review, explaining how the results align with the review's aim and questions.

#### 193 194 **Results**

195  
196 The selection of sources of evidence is illustrated in **Figure 1**. A total of 2,098 articles were  
197 identified from a search of electronic databases. After removing 434 duplicates, 1,662 titles  
198 and abstracts were screened. Full texts were retrieved for 210 studies, of which 190 were  
199 excluded for reasons such as not adequately measuring HL (n=84), did not measure HL pre  
200 and post-intervention (n=9), including the wrong participant population (n=18), and issues  
201 with validity, alignment with guidelines, and classification of PA (n=79). A total of 20  
202 articles met the inclusion criteria and were included in the review.

203  
204 **INSERT FIGURE 1**

205

## 206 Study characteristics

207 The study characteristics are summarised in **Table 1**. Among the studies selected for  
208 inclusion, most were cross-sectional design (n=3),<sup>23-35</sup> followed by longitudinal  
209 design(n=3),<sup>36-38</sup> prospective cohort design (n=1),<sup>39</sup> correlational study (n=1),<sup>40</sup> a combined  
210 cohort and case-control methods (n=1),<sup>41</sup> and an observational study of an intervention  
211 (n=1).<sup>42</sup> Most studies were published in Europe (n = 10),<sup>26,28,30,31,35-39,41</sup> including Germany (n  
212 = 2),<sup>30,37</sup> Denmark (n = 2),<sup>31,39</sup> Netherlands (n = 2),<sup>36,41</sup> United Kingdom (n = 1),<sup>38</sup> Italy (n =  
213 1),<sup>35</sup> Ireland (n = 1),<sup>26</sup> and a multi-national European study (n = 1).<sup>28</sup> Otherwise, studies were  
214 published in Canada (n = 2),<sup>23,42</sup> Australia (n = 2),<sup>27,29</sup> Turkey (n = 2),<sup>25,40</sup> and there was one  
215 study each from Iran,<sup>34</sup> Japan,<sup>32</sup> Singapore,<sup>24</sup> and the United States of America.<sup>33</sup>

216

217

**INSERT TABLE 1**

218

## 219 Health literacy

220 Various HL assessment tools were used in the included studies. Of the 20 studies, one used  
221 more than one measure to assess HL,<sup>42</sup> while three used only a portion of a survey,<sup>28,38,39</sup>  
222 Most studies used a version of the European health literacy survey (HLS-EU), including the  
223 HLS-EU-Q16 (n = 4),<sup>25,30,31,37</sup> HLS-EU-Q47 (n = 1),<sup>26</sup> and the Italian version of the HLS-EU-  
224 Q6 (n = 1),<sup>35</sup> The Brief Health Literacy Screen was utilised in four studies,<sup>23,24,36,41</sup> Two  
225 studies used the Health Literacy Questionnaire (HLQ-9); however, neither study used the  
226 entire scale. Specifically, Brors et al.<sup>39</sup> used four of the nine measurements: accessing,  
227 understanding, and appraising health information and the availability of social support to  
228 assist in managing health. Jennings et al.<sup>28</sup> only measured understanding of health  
229 information: The Health Literacy Management Scale<sup>27,29</sup> and the Medical Term Recognition  
230 Test<sup>33,42</sup> were also used in two studies. The Turkish Health Literacy Scale-32,<sup>40</sup> the Newest  
231 Vital Sign,<sup>40</sup> the Organisation for Economic Co-operation and Development International  
232 Adult Literacy Survey,<sup>38</sup> the Health Literacy for Iranian Adults tool,<sup>34</sup> and the Functional,  
233 Communicative, and Critical Health Literacy Scale<sup>32</sup> featured in one study each.

234

## 235 Physical activity:

236 Eighteen studies relied on self-reported measurements of PA. Of these, most used a direct  
237 question (n=12),<sup>25,26,27,28,29,30,35,36,37,38,39,40</sup> one used the Global Physical Activity  
238 Questionnaire,<sup>24</sup> one used the SQUASH questionnaire,<sup>41</sup> one used the SDSCA  
239 questionnaire,<sup>31</sup> and two employed the IPAQ short form.<sup>32,34</sup> Additionally, one study utilised  
240 the Health Information National Trends Survey.<sup>33</sup> One study solely used objective measures  
241 of PA.<sup>42</sup> One study combined both an objective measure, using a pedometer, with a self-  
242 reported measure of PA, specifically the Leisure Score Index from the Godin Leisure-Time  
243 Exercise Questionnaire.<sup>23</sup>

244

## 245 Findings

246 Fifteen studies examined the association between *total* HL scores and PA of  $\geq 150$  minutes of  
247 MVPA per week. Nine studies found a significant positive association between PA and HL,  
248 <sup>23,25,27,28,29,34,36,41,35</sup> while four studies found no such association.<sup>24,30,31,33</sup> One study reported a

249 significant association using unadjusted odds ratios, but this association became non-  
250 significant after adjusting for covariates.<sup>38</sup> Another study found that individuals with  
251 *inadequate* HL were more likely to engage in sufficient PA.<sup>40</sup>

252

253 One study specifically explored the relationship between PA of  $\geq 600$  MET and HL.<sup>24</sup> The  
254 unadjusted model indicated a significant association, but this association was no longer  
255 significant after adjustment for covariates. No association was found between adequate HL  
256 and the likelihood of achieving sufficient PA ( $\geq 8000$  steps/day) in either crude or adjusted  
257 models.

258

259 Five studies investigated the relationship between PA of  $\geq 150$  minutes per week and a  
260 specific subdomain of HL. One study consistently found significant associations between PA  
261 and the subdomains of social support, appraisal, access, and understanding in both crude and  
262 adjusted models.<sup>34</sup> Communicative HL was found to have a *non-significant* association with  
263 PA in 2 studies using unadjusted models; however, both studies reported no association when  
264 using adjusted models,<sup>31,32</sup> Three studies examined functional HL. Two reported non-  
265 significant associations in crude models,<sup>31,32</sup> and one found no association.<sup>33</sup> Only two of  
266 these studies used adjusted models, and both reported no association.<sup>31,32</sup> One study focused  
267 on three HL domains: Disease Prevention, Health Promotion, and Healthcare, each with four  
268 sub-indices: Accessing, Understanding, Evaluating, and Applying. Significant findings were  
269 reported only for Health Promotion (combined), Disease Prevention: Understanding, Health  
270 Promotion: Accessing, Health Promotion: Understanding, and Health Promotion:  
271 Evaluating.<sup>26</sup>

272

273 Only one intervention was included in the review. The intervention was an educational and  
274 exercise program designed to enhance disease-related knowledge and health behaviours in  
275 individuals with diabetes mellitus or pre-diabetes attending a Cardiovascular Prevention and  
276 Rehabilitation program.<sup>42</sup> After completing the intervention, participants had more sufficient  
277 PA ( $\geq 7500$  steps/day). However, the difference was not statistically significant ( $p = 0.41$ ).<sup>42</sup>

278

### 279 Pathways

280 One study investigated if self-efficacy, neutral/negative attitude and low-risk perception  
281 mediated the relationship between HL and sufficient PA.<sup>36</sup> Self-efficacy mediated 32% of the  
282 association between HL and sufficient PA, while neutral/negative attitude and low-risk  
283 perception did not show as mediators.<sup>36</sup>

284

285

## 286 **Discussion**

287

### 288 Summary of Key Finding

289 This scoping review aimed to identify and synthesise existing research on the relationship  
290 between HL and PA This review builds on previous work by Buja <sup>[12]</sup> and Lim et al. <sup>[13]</sup> by  
291 explicitly focusing on HL and its relationship with adherence to PA recommendations. The  
292 findings of this systematic review were inconsistent with those of Buja <sup>[12]</sup> and Lim et al. <sup>[13]</sup>.

293 This discrepancy may be in part caused by previous studies overlooking important research.  
294 Several studies not documented by Buja<sup>12</sup> were identified in this review, including those  
295 conducted by Gibney and Doyle,<sup>26</sup> Jayasinghe et al.<sup>27</sup> Jennings et al,<sup>28</sup> Juul et al,<sup>31</sup> and Reider  
296 et al.<sup>33</sup> Considering that our search, which has a narrow focus on PA guidelines, identified  
297 missed studies, it is plausible that previous evaluations may have overlooked further research  
298 outside our review's scope. Furthermore, half of the studies included in this review were  
299 published after Buja.<sup>12</sup> Considering the concept of HL is changing and increasing in  
300 complexity, more recent studies might be indicating a shift in the relationship between HL  
301 and PA. Therefore, this review may provide a new viewpoint on the impact of HL on PA,  
302 reflecting the changing nature of HL itself. Nevertheless, the changing concept of HL is  
303 improbable in explaining the disparity in our results, as Buja<sup>12</sup> and Lim et al<sup>13</sup> also  
304 documented substantial variation in the measure of HL between studies.  
305

306 The most likely explanation for the variation in results is in the measure of the PA. This study  
307 specifically reviewed adherence to PA guidelines, while other studies included a broader  
308 range of PA measures, including PA level (low, moderate, high), mean PA, and PA intensity  
309 (light, moderate, vigorous). PA guidelines are designed to be understood and followed,  
310 reducing an individual need to make decision-making compared to more self-directed forms  
311 of PA. As such, the complexity of PA tasks, in this case, the simplicity of following PA  
312 guidelines, are likely key factors in explaining the differences in findings.  
313

314 The results of our review suggest that there is some evidence to support an association  
315 between HL and PA. Compared with individuals with low HL, people with adequate HL  
316 were more likely to comply with PA recommendations and maintain a more active lifestyle.  
317 Nevertheless, all of these studies depend on self-reported PA data, which is susceptible to  
318 recall bias and inaccuracies in documenting actual PA.<sup>44</sup> This implies the necessity of  
319 exercising caution when interpreting the results and restricts the reliability of the findings.  
320 Therefore, although some evidence suggests an association between HL and PA, the  
321 dependence on self-reported data introduces constraints that must be resolved in subsequent  
322 research.  
323

324 Interestingly, the two studies that used objective measures of PA reported no association  
325 between HL and PA.<sup>23,42</sup> This is a key finding that contrasts with studies relying on self-  
326 reported data. An explanation for this may be the role of self-perception in HL. Individuals  
327 with higher HL might report PA levels that align more with health recommendations, even if  
328 their actual activity levels do not differ significantly from individuals with lower HL when  
329 measured objectively. Another explanation is HL may influence how PA is reported in self-  
330 report questionnaires. Participants with inadequate HL might have underreported their actual  
331 PA compared to those with adequate HL, potentially due to misunderstanding or  
332 misinterpreting the questions. Overall, the evidence on the relationship between HL and PA  
333 remains inconclusive. While there is some indication of a link, the current body of research is  
334 insufficient to draw any conclusions.  
335  
336



337

### 338 Gaps in the literature and future recommendations

339 Most studies are cross-sectional, limiting conclusions about causality between HL and PA.

340 This limitation arises because cross-sectional designs capture data at a single point, making it  
341 difficult to track changes and effects over time.<sup>45</sup> Therefore, to draw more definitive

342 conclusions about the relationship between HL and PA, future research should prioritise  
343 addressing the lack of longitudinal studies.

344

345 Half of the studies in our review used multivariate logistic regression analysis. This approach  
346 enhanced the clarity of the results by accounting for various confounders and allowed for the  
347 measurement of odds ratios, which quantifies the strength of the association between each  
348 predictor and the outcome, making the results easier to interpret.<sup>46</sup> However, the selection of  
349 confounding variables varied across studies, which complicated synthesising the overall  
350 findings. Furthermore, some studies controlled for factors that may lie within the causal  
351 pathway. Factors like knowledge and income might mediate the relationship between HL and  
352 health outcomes. This "overadjustment" could have underestimated the true effect of HL by  
353 masking its direct influence on PA.

354

355 Only one study in this review actually investigated possible mediating effects, identifying  
356 self-efficacy as mediating the relationship between HL and PA. This finding is consistent  
357 with previous empirical studies that found that self-efficacy mediates HL and self-care  
358 behaviours.<sup>47</sup>

359

### 360 Implications

361 The findings from this review reinforce the need for further research to better understand the  
362 association between HL and PA. The review's inconclusive results suggest that there is not  
363 yet a consistent link between HL and compliance with PA guidelines. This raises concerns  
364 about assuming that improving HL alone will significantly enhance PA. Policymakers should  
365 therefore be cautious when relying on HL as the primary driver of interventions aimed at  
366 raising population PA levels to meet guidelines. In practice, healthcare professionals should  
367 continue to acknowledge HL in the provision of services. However, when implementing  
368 strategies to improve PA adherence, focusing on approaches with stronger evidence-based  
369 behavioural outcomes will offer a more comprehensive solution for enhancing PA  
370 compliance.

371

### 372 Strengths and Limitations

373 Our study has several strengths. First, the extensive search strategy makes it unlikely that any  
374 significant studies were missed. Additionally, the low risk of bias from selective reporting  
375 strengthens the study's objectivity, as many published studies show no relationship between  
376 HL and compliance with PA recommendations. However, there are some limitations. This  
377 review did not assess the methodological quality of the selected studies restricts our ability to  
378 assess the overall findings. Furthermore, including only English-language articles may have  
379 excluded important studies published in other languages, potentially introducing a language  
380 bias and limiting the generalisability of the results.

381  
382  
383  
384  
385  
386  
387  
388  
389  
390  
391  
392  
393  
394  
395  
396  
397  
398  
399  
400  
401  
402  
403  
404  
405  
406  
407  
408  
409  
410  
411  
412  
413  
414  
415  
416  
417  
418  
419  
420  
421  
422  
423  
424

**Conclusion**

To our knowledge, this is the first scoping review exploring the association between HL and PA. Despite the growing prevalence and importance of HL research, this scoping review reports substantial heterogeneity in the measure of HL making it difficult to confidently conclude that HL is associated with PA. Future research should focus on longitudinal designs, standardising HL measures, and exploring the potential mediators of the HL-PA relationship, such as self-efficacy.

## 425 References

426

- 427 1. Sørensen K, Van Den Broucke S, Fullam J, Doyle G, Pelikan J, Slonska Z, et al.  
428 Health literacy and public health: A systematic review and integration of definitions  
429 and models. *BMC Public Health*. 2012;12(1):80. doi:10.1186/1471-2458-12-80
- 430 2. Nutbeam D. Health literacy as a public health goal: a challenge for contemporary  
431 health education and communication strategies into the 21st century. *Health Promot.*  
432 *Int*. 2000;15(3):259-67.
- 433 3. Fan Z-Y, Yang Y, Zhang F. Association between health literacy and mortality: a  
434 systematic review and meta-analysis. *Arch Public Health*. 2021;79(1).
- 435 4. Aaby A, Friis K, Christensen B, Rowlands G, Maindal HT. Health literacy is  
436 associated with health behaviour and self-reported health: A large population-based  
437 study in individuals with cardiovascular disease. *Eur J Prev Cardiol*.  
438 2017;24(17):1880-8.
- 439 5. Garcia-Codina O, Juvinyà-Canal D, Amil-Bujan P, Bertran-Noguer C, González-  
440 Mestre MA, Masachs-Fatjo E, et al. Determinants of health literacy in the general  
441 population: results of the Catalan health survey. *BMC Public Health*.  
442 2019;19(1):1122.
- 443 6. Strain T, Flaxman S, Guthold R, Semanova E, Cowan M, Riley LM, et al. National,  
444 regional, and global trends in insufficient physical activity among adults from 2000 to  
445 2022: a pooled analysis of 507 population-based surveys with 5·7 million participants.  
446 *The Lancet Global Health*. 2024;12(8):e1232-e43.
- 447 7. Lacombe J, Armstrong MEG, Wright FL, Foster C. The impact of physical activity  
448 and an additional behavioural risk factor on cardiovascular disease, cancer and all-  
449 cause mortality: a systematic review. *BMC Public Health*. 2019;19(1).
- 450 8. Lee IM, Shiroma EJ, Lobelo F, Puska P, Blair SN, Katzmarzyk PT. Effect of physical  
451 inactivity on major non-communicable diseases worldwide: an analysis of burden of  
452 disease and life expectancy. *The Lancet*. 2012;380(9838):219-29.
- 453 9. Das P, Horton R. Physical activity—time to take it seriously and regularly. *The*  
454 *Lancet*. 2016;388(10051):1254-5.
- 455 10. Lee DH, Rezende LFM, Joh HK, Keum N, Ferrari G, Rey-Lopez JP, et al. Long-Term  
456 Leisure-Time Physical Activity Intensity and All-Cause and Cause-Specific  
457 Mortality: A Prospective Cohort of US Adults. *Circulation*. 2022;146(7):523-34.
- 458 11. Swann C, Rosenbaum S. Do we need to reconsider best practice in goal setting for  
459 physical activity promotion? *BJSM*. 2018;52(8):485-6.
- 460 12. Buja A, Rabensteiner A, Sperotto M, Grotto G, Bertoncetto C, Cocchio S, et al.  
461 Health Literacy and Physical Activity: A Systematic Review. *JPAH*.  
462 2020;17(12):1259-74.
- 463 13. Lim ML, van Schooten KS, Radford KA, Delbaere K. Association between health  
464 literacy and physical activity in older people: a systematic review and meta-analysis.  
465 *Health Promot. Int*. 2021;36(5):1482-97.
- 466 14. Tian CY, Mo PK, Dong D, Cheung AW, Wong EL. Development and validation of a  
467 comprehensive health literacy tool for adults in Hong Kong. *Front Public Health*.  
468 2022;10:1043197.

- 469 15. Mantwill S, Monestel-Umaña S, Schulz PJ. The Relationship between Health Literacy  
470 and Health Disparities: A Systematic Review. *PLOS ONE*. 2015;10(12):e0145455.
- 471 16. Levac D, Colquhoun H, O'Brien KK. Scoping studies: advancing the methodology.  
472 *Implementation Science*. 2010;5(1):69.
- 473 17. Munn Z, Peters MDJ, Stern C, Tufanaru C, McArthur A, Aromataris E. Systematic  
474 review or scoping review? Guidance for authors when choosing between a systematic  
475 or scoping review approach. *BMC Medical Research Methodology*. 2018;18(1).
- 476 18. Peters MDJ, Marnie C, Tricco AC, Pollock D, Munn Z, Alexander L, et al. Updated  
477 methodological guidance for the conduct of scoping reviews. *JBI Evidence Synthesis*.  
478 2020;18(10):2119-26.
- 479 19. Pollock D, Davies EL, Peters MDJ, Tricco AC, Alexander L, McInerney P, et al.  
480 Undertaking a scoping review: A practical guide for nursing and midwifery students,  
481 clinicians, researchers, and academics. *Journal of Advanced Nursing*.  
482 2021;77(4):2102-13.
- 483 20. Tricco AC, Lillie E, Zarin W, O'Brien KK, Colquhoun H, Levac D, et al. PRISMA  
484 Extension for Scoping Reviews (PRISMA-ScR): Checklist and Explanation. *Ann*  
485 *Intern Med*. 2018;169(7):467-73.
- 486 21. Walters R, Leslie SJ, Polson R, Cusack T, Gorely T. Establishing the efficacy of  
487 interventions to improve health literacy and health behaviours: a systematic review.  
488 *BMC Public Health*. 2020;20(1).
- 489 22. McGowan J, Sampson M, Salzwedel DM, Cogo E, Foerster V, Lefebvre C. PRESS  
490 Peer Review of Electronic Search Strategies: 2015 Guideline Statement. *Journal of*  
491 *Clinical Epidemiology*. 2016;75:40-6.
- 492 23. Al Sayah F, Johnson ST, Vallance J. Health Literacy, Pedometer, and Self-Reported  
493 Walking Among Older Adults. *Am J Public Health*. 2016;106(2):327-33.
- 494 24. Asharani PV, Lau JH, Roystonn K, Devi F, Peizhi W, Shafie S, et al. Health Literacy  
495 and Diabetes Knowledge: A Nationwide Survey in a Multi-Ethnic Population. *Int J*  
496 *Environ Res Public Health*. 2021;18(17).
- 497 25. Emiral GO, Tozun M, Atalay BI, Goktas S, Dagtekin G, Aygar H, et al. Assessment of  
498 knowledge of metabolic syndrome and health literacy level among adults in Western  
499 Turkey. *Niger J Clin Pract*. 2021;24(1):28-37.
- 500 26. Gibney S, Doyle G. Self-rated health literacy is associated with exercise frequency  
501 among adults aged 50+ in Ireland. *Eur J Public Health*. 2017;27(4):755-61.
- 502 27. Jayasinghe UW, Harris MF, Parker SM, Litt J, van Driel M, Mazza D, et al. The impact  
503 of health literacy and life style risk factors on health-related quality of life of Australian  
504 patients. *Health and quality of life outcomes*. 2016;14:68.
- 505 28. Jennings CS, Astin F, Prescott E, Hansen T, Gale Chris P, De Bacquer D. Illness  
506 perceptions and health literacy are strongly associated with health-related quality of  
507 life, anxiety, and depression in patients with coronary heart disease: results from the  
508 EUROASPIRE V cross-sectional survey. *Eur J Cardiovasc Nurs*. 2023;22(7):719-29.
- 509 29. Joshi A, Mehta S, Grover A, Talati K, Malhotra B, Puricelli Perin DM. Knowledge,  
510 attitude, and practices of individuals to prevent and manage metabolic syndrome in an  
511 Indian setting. *Diabetes Technol Ther*. 2013;15(8):644-53.

- 512 30. Joshi C, Jayasinghe UW, Parker S, Mar CD, Russell G, Lloyd J, et al. Does health  
513 literacy affect patients' receipt of preventative primary care? A multilevel analysis.  
514 *BMC Fam. Pract.* 2014;15(1):171-80.
- 515 31. Jürgensen IN, Koch P, Otto R, Nock AM, Petersen-Ewert C. Subjective Health Status,  
516 Health-Related Behavior, and Health Literacy of Health Professional Students: Results  
517 from a Cross-Sectional Study. *Healthcare (Basel)*. 2024;12(2).
- 518 32. Juul L, Rowlands G, Maindal HT. Relationships between health literacy, motivation  
519 and diet and physical activity in people with type 2 diabetes participating in peer-led  
520 support groups. *Prim Care Diabetes*. 2018;12(4):331-7.
- 521 33. Nagaki K, Mishima T, Ohura T, Kurihara K, Fujioka S, Tsuboi Y. Association between  
522 physical activity and health literacy in patients with Parkinson's disease: an online web  
523 survey. *BMC Neurol*. 2023;23(1):403.
- 524 34. Reider N, Salter AR, Cutter GR, Tyry T, Marrie RA. Potentially Modifiable Factors  
525 Associated With Physical Activity in Individuals With Multiple Sclerosis. *Res Nurs*  
526 *Health*. 2017;40(2):143-52.
- 527 35. Shahavandi M, Ghorbaninejad P, Mohammadpour S, Djafari F, Shahinfar H,  
528 Sheikhhossein F, et al. Higher health literacy score is associated with better healthy  
529 eating index in Iranian adults. *Nutrition*. 2021;90:111262.
- 530 36. Zanobini P, Lorini C, Lastrucci V, Minardi V, Possenti V, Masocco M, et al. Health  
531 Literacy, Socio-Economic Determinants, and Healthy Behaviours: Results from a  
532 Large Representative Sample of Tuscany Region, Italy. *Int. J. Environ. Res. Public*  
533 *Health*. 2021;18(23):11.
- 534 37. Geboers B, de Winter AF, Lutten KA, Jansen CJ, Reijneveld SA. The association of  
535 health literacy with physical activity and nutritional behavior in older adults, and its  
536 social cognitive mediators. *J Health Commun*. 2014;19 Suppl 2:61-76.
- 537 38. Koch P, Kersten JF, Nienhaus A. Monitoring a cohort of trainees: changes over time  
538 and associations between health literacy, health behaviour and health. *J Occup Med*  
539 *Toxicol*. 2023;18(1):18.
- 540 39. Kobayashi LC, Wardle J, Wolf MS, von Wagner C. Health Literacy and Moderate to  
541 Vigorous Physical Activity During Aging, 2004–2013. *AJPM*. 2016;51(4):463-72.
- 542 40. Brors G, Dalen H, Allore H, Deaton C, Fridlund B, Osborne RH, et al. Health Literacy  
543 and Risk Factors for Coronary Artery Disease (From the CONCARDPCI Study). *Am J*  
544 *Cardiol*. 2022;179:22-30.
- 545 41. Ahcioglu A, Yilmazel G. Health literacy, behavioral and psychosocial characteristics  
546 in coronary artery patients: A hospital-based study in Turkey. *J Acute Dis*.  
547 2022;11(1):18-25.
- 548 42. Geboers B, Reijneveld SA, Jansen CJM, de Winter AF. Health Literacy Is Associated  
549 With Health Behaviors and Social Factors Among Older Adults: Results from the  
550 LifeLines Cohort Study. *J Health Commun*. 2016;21:45-53.
- 551 43. Ghisi GLM, Alavinia M, Aultman C, Rouleau F, Ross MK, Dufour-Doiron M, et al.  
552 Predictors of Exercise Maintenance 6 Months After Comprehensive Cardiac  
553 Rehabilitation. *J Cardiopulm Rehabil Prev*. 2021;41(2):100-8.
- 554 44. Olds TS, Gomersall SR, Olds ST, Ridley K. A source of systematic bias in self-reported  
555 physical activity: The cutpoint bias hypothesis. *JSAMS* 2019;22(8):924-8.

- 556 45. Wang X, Cheng Z. Cross-Sectional Studies: Strengths, Weaknesses, and  
557 Recommendations. *Chest*. 2020;158(1):S65-S71.
- 558 46. Alexopoulos EC. Introduction to multivariate regression analysis. *Hippokratia*.  
559 2010;14(1):23-8.
- 560 47. Chen AMH, Yehle KS, Plake KS, Rathman LD, Heinle JW, Frase RT, et al. The role  
561 of health literacy, depression, disease knowledge, and self-efficacy in self-care among  
562 adults with heart failure: An updated model. *Heart & Lung*. 2020;49(6):702-8.  
563
